# Supplementary material for: Mixed-metal complex [Fe(bipe)(Au(CN)2)2·MeOH] with gold clusters: a novel two-dimensional polyrotaxane net clipped by aurophilic interaction
Source: Royal Society of Chemistry journal article supplement (doi:10.1039/c0ce00376j), 2010-01-01
Supplement: c0ce00376j.pdf [file c0ce00376j.pdf]

*Supporting Information*

***The Mixed-metal Complex [Fe(bipe)(Au(CN)<sub>2</sub>)<sub>2</sub>MeOH] with Gold Clusters: A Novel Two-Dimensional Polycatenated Polyrotaxane Net Clipped by Auophilic Interaction***

*Haitao Xu, Gergely Juhász, Kazunari Yoshizawa\*, Masashi Takahashi, Shinji Kanegawa and Osamu Sato\**

*Institute for Materials Chemistry and Engineering, Kyushu University,*

*6-1 Kasuga-koen, Kasuga, Fukuoka, 816-8580, Japan*

*Institute for Materials Chemistry and Engineering, Kyushu University, Nishi-ku, Fukuoka 819-0395, Japan*

*Toho University, Department of Chemistry, 2-2-1 Miyama, Funabashi, Chiba 274-8510, Japan*

*E-mail: kazunari@ms.ifoc.kyushu-u.ac.jp and sato@cm.kyushu-u.ac.jp*

## Experimental section

All reagents and solvents used in the syntheses were of reagent grade and used without further purification. Elemental analyses of carbon, hydrogen, and nitrogen were conducted at the Center for Elemental Analysis, Kyushu University. Infrared spectroscopy studies were performed on a JASCO FT/IR-600 Plus spectrometer in the 4000–400  $\text{cm}^{-1}$  region. UV–Vis spectra were recorded on a Shimadzu UV-3100PC spectrometer with an MPC 3100 unit.

Magnetic susceptibility measurements were carried out on a Quantum Design MPMS-5S SQUID system. Experimental susceptibilities were corrected for diamagnetism of the background the sample holder and its constituent atoms.

X-ray diffraction experiment was carried out on a Rigaku CCD diffractometer using Mo- $K\alpha$  radiation ( $\lambda = 0.71073 \text{ \AA}$ ) at 123(2) K. The following software was used for data collection, cell refinement and data reduction: CrystalClear 1.3.5 (Rigaku) and RAPID AUTO 2.01 (Rigaku). The structures were solved and refined using the direct method and full-matrix method based on  $F^2$  using the SHELXL97 software package (Sheldrick, 1997). All non-hydrogen atoms were refined anisotropically and their positions were generated geometrically.

$^{197}\text{Au}$  Mössbauer spectra were measured at 20 K as described previously.<sup>1</sup> The  $^{197}\text{Pt/Pt}$  Mössbauer source was prepared by neutron irradiation of a 100 mg disc of enriched metallic  $^{196}\text{Pt}$  in the JRR-4 reactor of JAERI. The Mössbauer spectra were measured at Toho University using a Mössbauer spectrometer from Wissel (MDU-1200 function generator, DFG-1200 driving unit, MVT-100 velocity transducer and MVC-1200 laser calibrator). The isomer shift is given relative to the  $^{197}\text{Pt/Pt}$  source at 20 K.

1) M. Takeda, M. Takahashi, Y. Ito, T. Takano, M. A. Bennett, S. K. Bhargava, *Chem. Lett.* 1990, 543

*Table 1 Crystallographic data for the complex [Fe(bipe)(Au(CN)<sub>2</sub>)<sub>2</sub>MeOH].*

|                                       |                                                                    |
|---------------------------------------|--------------------------------------------------------------------|
| Empirical formula                     | C <sub>17</sub> H <sub>15</sub> Au <sub>2</sub> FeN <sub>6</sub> O |
| Formula weight                        | 769.13                                                             |
| Space group                           | <i>P</i> -1 (no. 2)                                                |
| <i>T</i> (K)                          | 123(2)                                                             |
| <i>a</i> (Å)                          | 7.227(3)                                                           |
| <i>b</i> (Å)                          | 10.992(4)                                                          |
| <i>c</i> (Å)                          | 13.404(6)                                                          |
| $\alpha^{\circ}$                      | 79.21(2)                                                           |
| $\beta^{\circ}$                       | 79.17(2)                                                           |
| $\gamma^{\circ}$                      | 74.06(2)                                                           |
| <i>V</i> (Å <sup>3</sup> )            | 995.21(70)                                                         |
| <i>Z</i>                              | 2                                                                  |
| $\rho_{\text{cal}}$ Mg/m <sup>3</sup> | 2.566                                                              |
| <i>R</i>                              | 0.0250                                                             |
| <i>R</i> <sub>w</sub>                 | 0.0634                                                             |
| <i>GOF</i>                            | 1.100                                                              |

*Table 2. Selected bond lengths (Å) of the complex [Fe(bipe)(Au(CN)<sub>2</sub>)<sub>2</sub>MeOH]*

|                      |           |                       |           |
|----------------------|-----------|-----------------------|-----------|
| N6—C15               | 1.333(17) | Au2—C2                | 1.986(21) |
| C8—C7                | 1.402(9)  | C5—O1                 | 1.426(17) |
| N6—C16               | 1.343(13) | Au2—C2 <sup>iii</sup> | 1.986(21) |
| C8—C11               | 1.507(19) | Au3—C3 <sup>iv</sup>  | 1.980(25) |
| N6—Fe <sup>i</sup>   | 2.210(13) | Au3—C3                | 1.980(25) |
| C6—N5                | 1.336(10) | Au3—Au <sup>v</sup>   | 3.103(40) |
| C16—C17              | 1.379(11) | C4—N4                 | 1.130(11) |
| C6—C7                | 1.371(18) | Au3—Au <sup>vi</sup>  | 3.103(40) |
| C14—C15              | 1.389(11) | Fe4—O1                | 2.118(25) |
| C14—C13              | 1.388(13) | C3—N3                 | 1.154(16) |
| C2—N2                | 1.142(14) | Fe4—N3                | 2.152(28) |
| C12—C11              | 1.524(18) | C9—C10                | 1.388(18) |
| C13—C17              | 1.400(18) | Fe4—N2                | 2.152(27) |
| C13—C12              | 1.499(11) | C9—C8                 | 1.39(1)   |
| Au1—C1               | 1.991(16) | Fe4—N1                | 2.184(13) |
| Au1—C4               | 2.001(15) | Fe4—N5                | 2.200(27) |
| Au1—Au <sup>ii</sup> | 3.103(40) | C10—N5                | 1.356(8)  |
| C1—N1                | 1.139(11) | Fe4—N6 <sup>i</sup>   | 2.210(13) |

Table 3. Selected bond Angles ( $^{\circ}$ ) of the complex  $[Fe(bipe)(Au(CN)_2)_2MeOH]$

|                                         |            |                        |            |
|-----------------------------------------|------------|------------------------|------------|
| C15—N6—C16                              | 116.46(41) | N3—Fe4—N1              | 87.75(16)  |
| C15—N6—Fe4 <sup>i</sup>                 | 119.71(34) | C10—C9—C8              | 120.57(40) |
| C16—N6—Fe4 <sup>i</sup>                 | 123.82(34) | N2—Fe4—N1              | 88.24(16)  |
| N6—C16—C17                              | 123.71(49) | O1—Fe4—N5              | 177.93(13) |
| C8—C11—C12                              | 114.22(40) | N3—Fe4—N5              | 88.75(15)  |
| C15—C14—C13                             | 121.39(44) | N5—C10—C9              | 122.77(47) |
| N6—C15—C14                              | 122.93(46) | N2—Fe4—N5              | 91.39(15)  |
| C16—C17—C13                             | 120.58(49) | N1—Fe4—N5              | 91.36(15)  |
| C14—C13—C17                             | 114.88(41) | O1—Fe4—N6 <sup>i</sup> | 89.03(14)  |
| C14—C13—C12                             | 124.22(42) | C9—C8—C7               | 115.82(40) |
| N1—C1—Au1                               | 174.56(46) | N3—Fe4—N6 <sup>i</sup> | 91.83(15)  |
| C17—C13—C12                             | 120.89(45) | C9—C8—C11              | 122.93(38) |
| C1—Au1—C4                               | 175.90(21) | N2—Fe4—N6 <sup>i</sup> | 92.18(15)  |
| C1—Au1—Au3 <sup>ii</sup>                | 87.78(13)  | C7—C8—C11              | 121.25(41) |
| C4—Au1—Au3 <sup>ii</sup>                | 95.91(15)  | N1—Fe4—N6 <sup>i</sup> | 179.12(16) |
| C2—Au2—C2 <sup>iii</sup>                | 180.00(19) | N5—C6—C7               | 123.92(46) |
| C3 <sup>iv</sup> —Au3—C3                | 179.99(19) | N5—Fe4—N6 <sup>i</sup> | 89.41(15)  |
| C3 <sup>iv</sup> —Au3—Au1 <sup>v</sup>  | 86.51(13)  | C3—N3—Fe4              | 175.40(38) |
| N4—C4—Au1                               | 177.71(49) | C6—N5—C10              | 116.48(43) |
| C3—Au3—Au1 <sup>v</sup>                 | 93.49(13)  | C6—C7—C8               | 120.43(46) |
| O1—Fe4—N3                               | 89.94(14)  | C6—N5—Fe4              | 121.60(33) |
| C3 <sup>iv</sup> —Au3—Au1 <sup>vi</sup> | 93.49(13)  | C10—N5—Fe4             | 121.82(33) |
| O1—Fe4—N2                               | 90.03(13)  | C2—N2—Fe4              | 169.42(38) |
| C3—Au3—Au1 <sup>vi</sup>                | 86.51(13)  | N2—C2—Au2              | 176.49(40) |
| N3—Fe4—N2                               | 175.99(16) | C1—N1—Fe4              | 161.00(42) |
| Au1 <sup>v</sup> —Au3—Au1 <sup>vi</sup> | 180.00(2)  | C13—C12—C11            | 116.51(41) |
| O1—Fe4—N1                               | 90.19(14)  | C5—O1—Fe4              | 125.27(27) |
| N3—C3—Au3                               | 178.95(40) |                        |            |

**Symmetry codes:**

(i) 1-x, 1-y, 1-z; (ii) 1+x, y, z; (iii) 3-x, 1-y, 1-z; (iv) 1-x, 2-y, -z; (v) -1+x, y, z; (vi) 2-x, 2-y, -z.

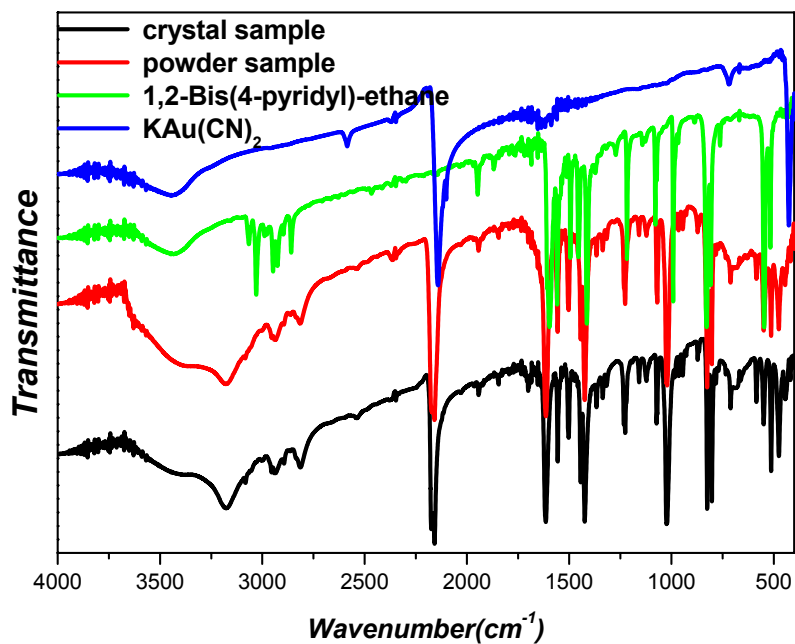

Figure S1. Infrared spectroscopy of the complex  $Fe(bipe)(Au(CN)_2)_2MeOH$  at the room temperature.

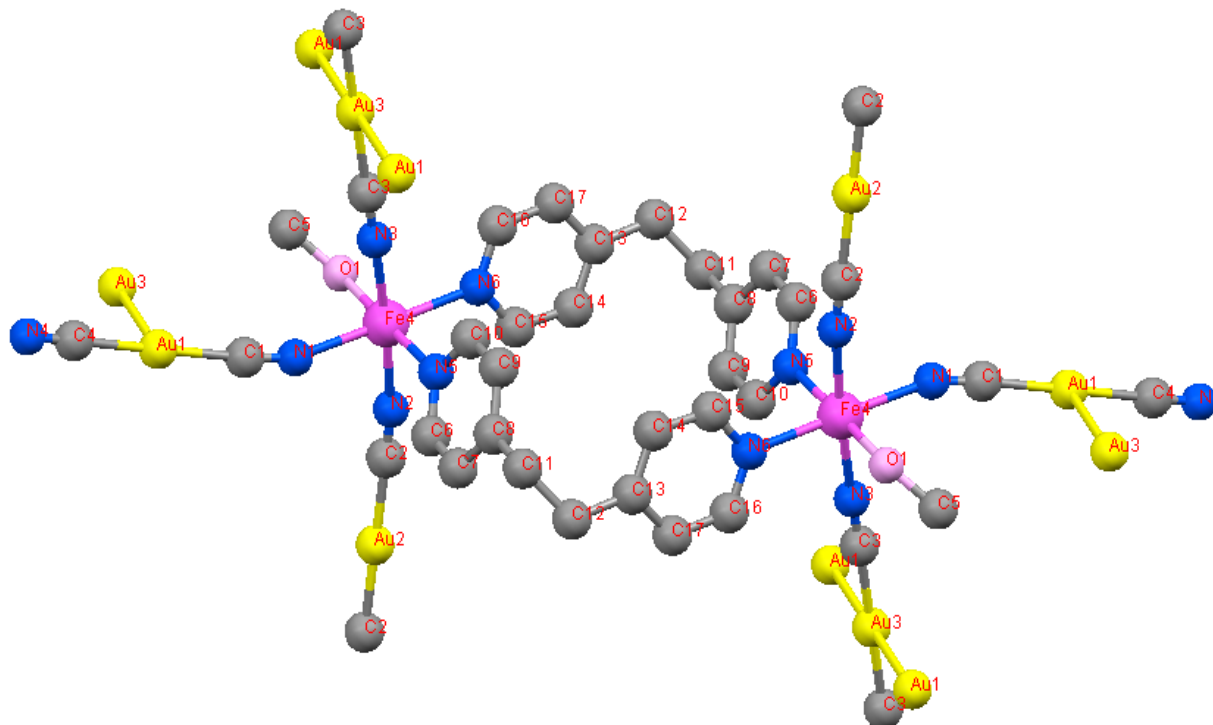

Figure S2. The ORTEP plot of the structure in the crystal  $[Fe(bipe)(Au(CN)_2)_2MeOH]$

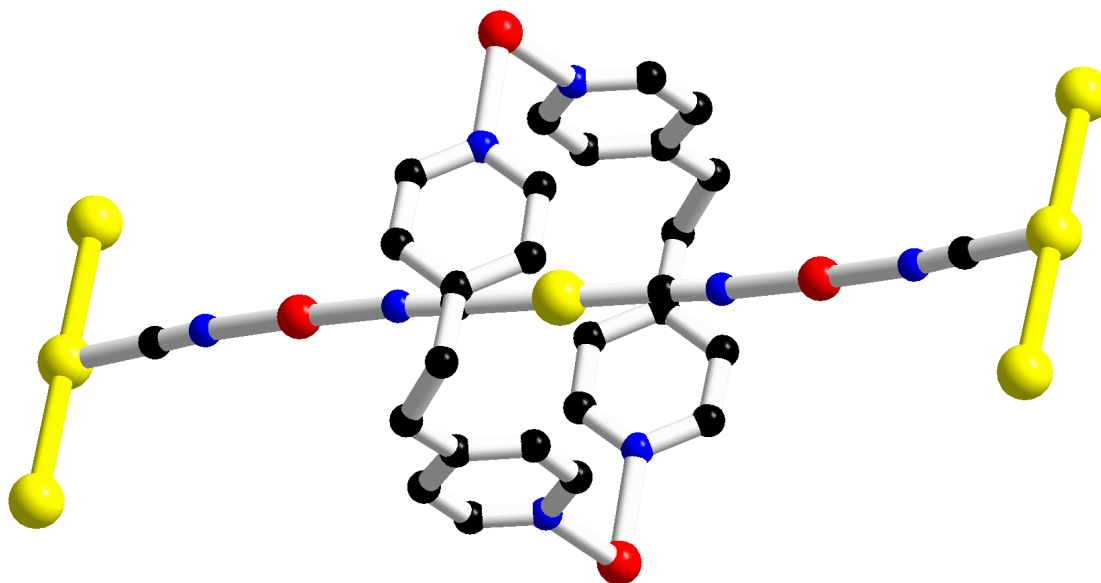

Figure S3. Mixed-metal rod Fe-Au passing through the metal-ring  $\text{Fe}_2(\text{bipe})_2$  in the crystal  $[\text{Fe}(\text{bipe})(\text{Au}(\text{CN})_2)_2\text{MeOH}]$

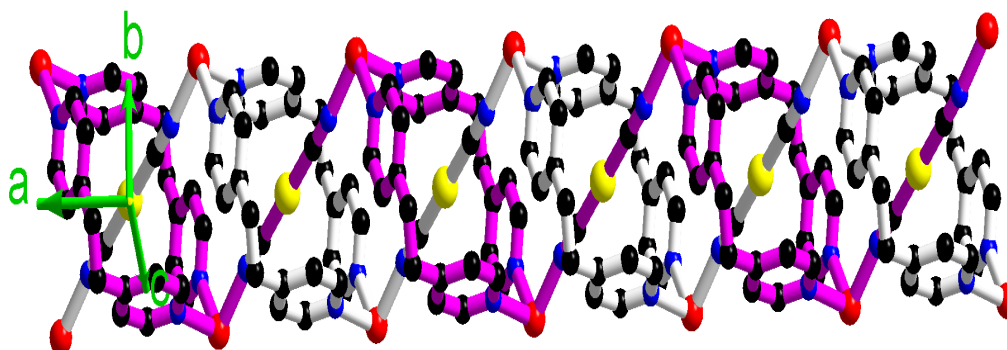

Figure S4. Polyrotaxane column present in the  $[\text{Fe}(\text{bipe})(\text{Au}(\text{CN})_2)_2\text{MeOH}]$  framework. The components of two independent networks are indicated by purple and white connections respectively. (Hydrogens and MeOH are omitted for clarity)

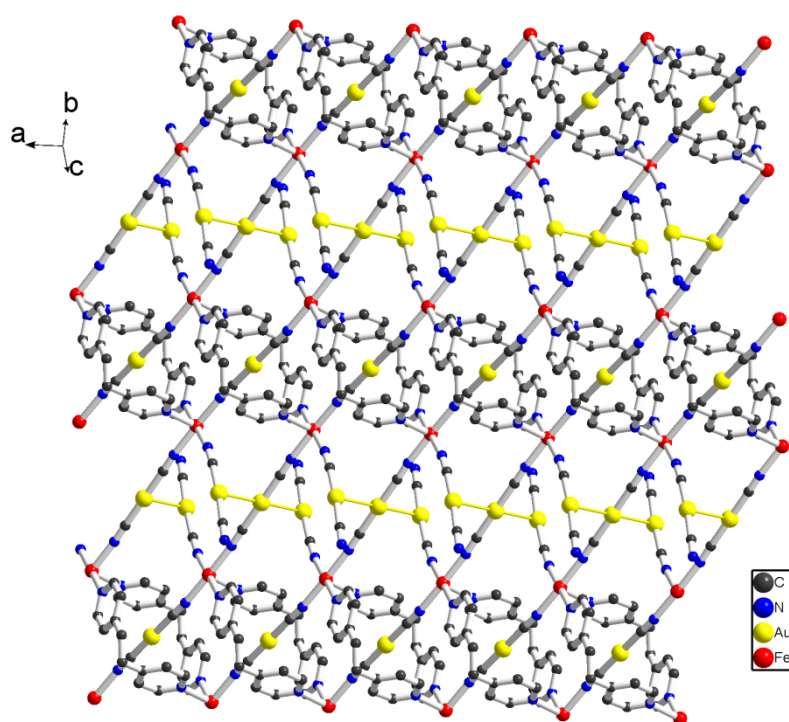

Figure S5. 2D-layer structural diagram of the crystal  $[Fe(bipe)(Au(CN)_2)_2MeOH]$  with gold clusters (MeOH is omitted for clarity)

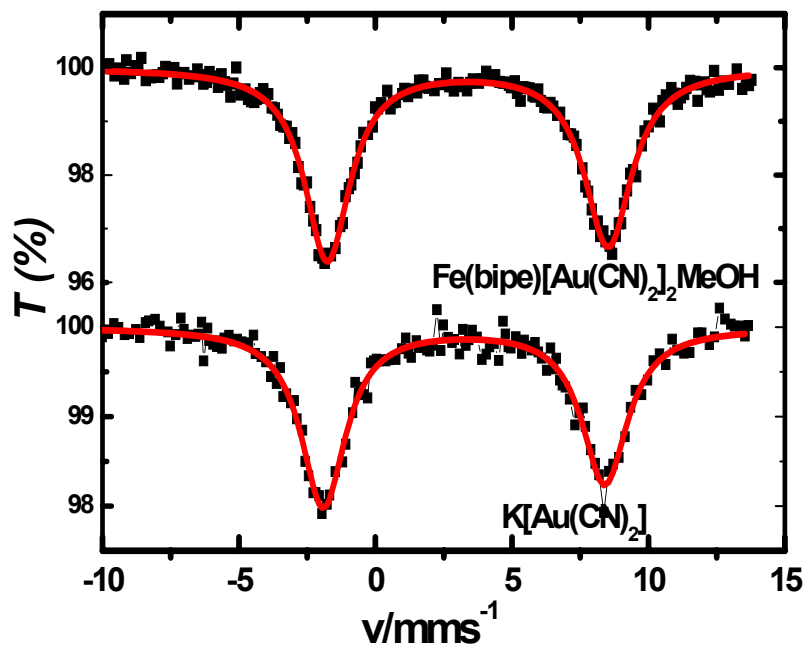

Figure S6.  $^{197}\text{Au}$  Mössbauer spectrum of  $[\text{Fe}(\text{bipe})(\text{Au}(\text{CN})_2)_2\text{MeOH}]$  and  $\text{K}[\text{Au}(\text{CN})_2]$  at 20 K

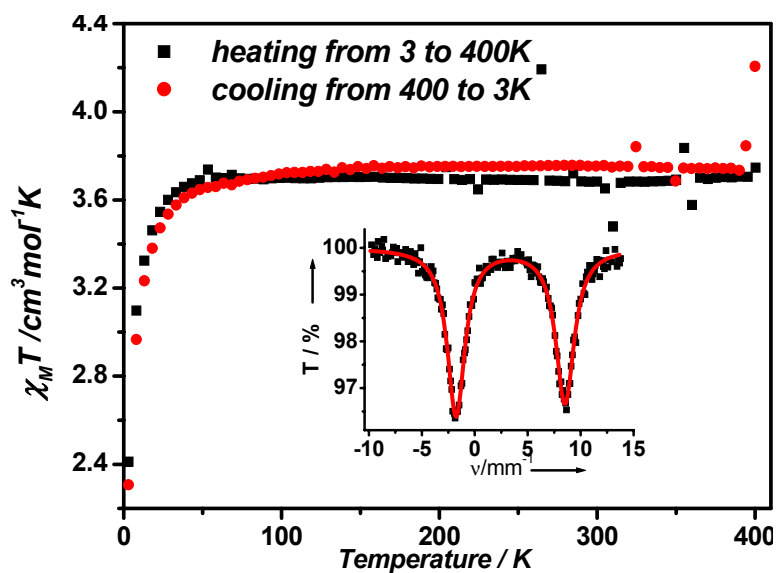

Figure S7. Temperature dependence of  $\chi_m T$ – $T$  plots of the powder sample of the complex  $[\text{Fe}(\text{bipe})(\text{Au}(\text{CN})_2)_2\text{MeOH}]$ . Inset :  $^{197}\text{Au}$  Mössbauer spectrum of the complex  $[\text{Fe}(\text{bipe})(\text{Au}(\text{CN})_2)_2\text{MeOH}]$  at 20 K



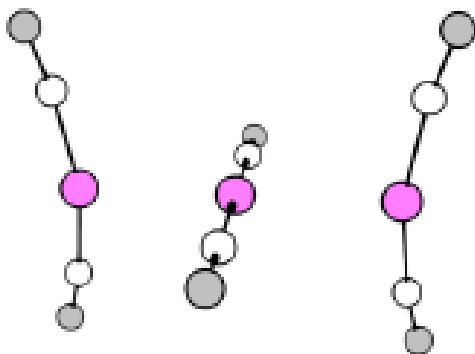

Figure S8. The structure of  $[Au(CN)_2]_3^{3+}$  in the complex  $Fe(bipe)(Au(CN)_2)_2MeOH$ .

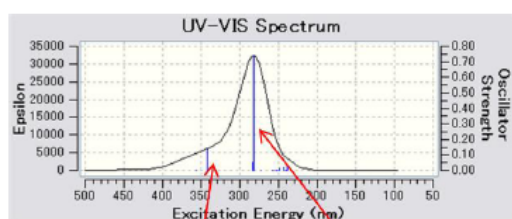

**HOMO -> LUMO+1**

**HOMO -> LUMO+2**

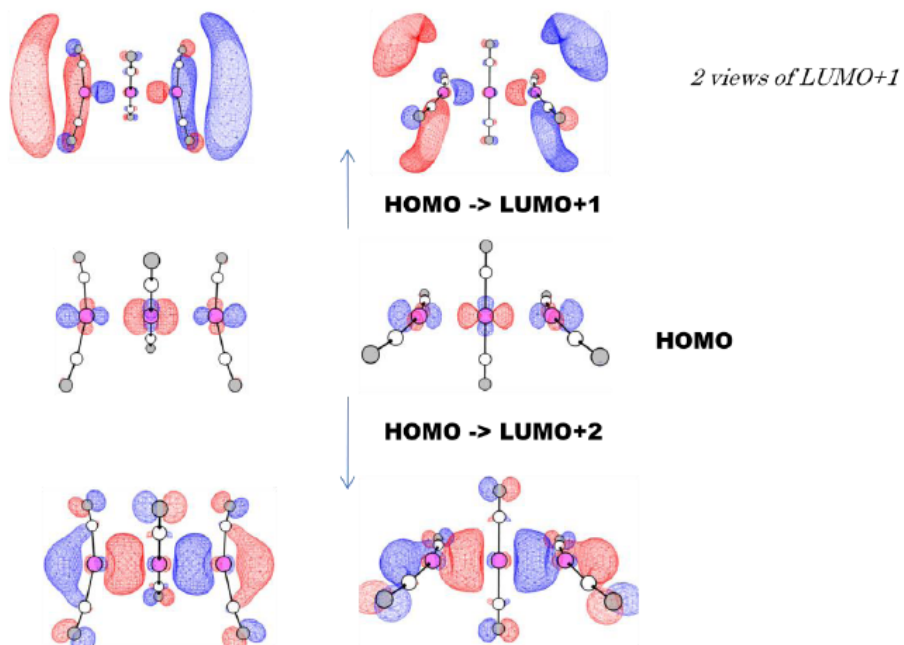

Figure S9. The UV-Vis active transitions of  $[Au(CN)_2]_3^{3+}$  from HOMO ( $d\sigma^*\sigma^*$ ) to LUMO+1( $p\sigma\sigma$ ) and to LUMO +2 ( $p\sigma\sigma$ )

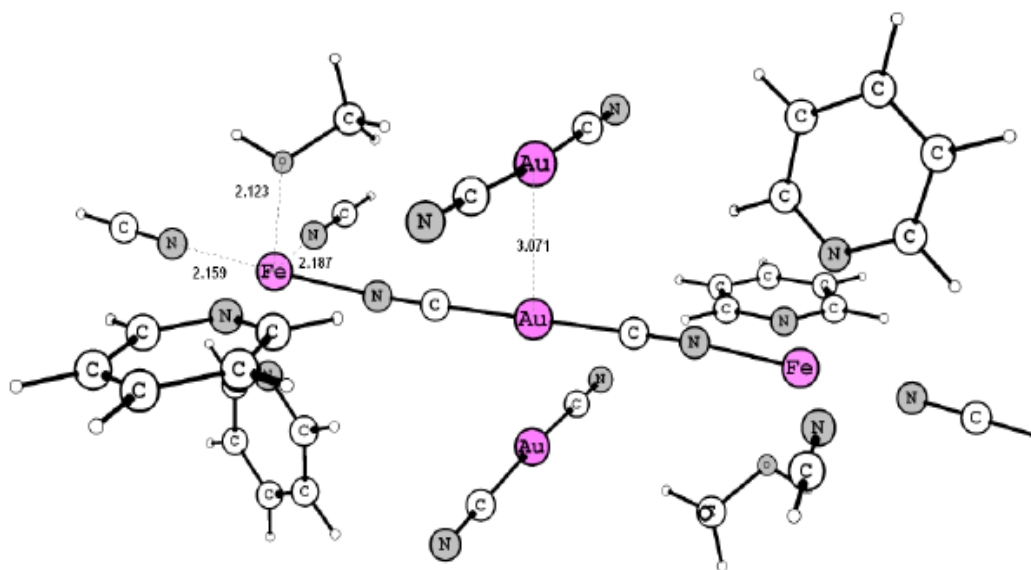

Figure S10. The Structure of  $[Fe(II)(py)_2MeOH](CNH)_2]_2[Au(CN)_2]_3$

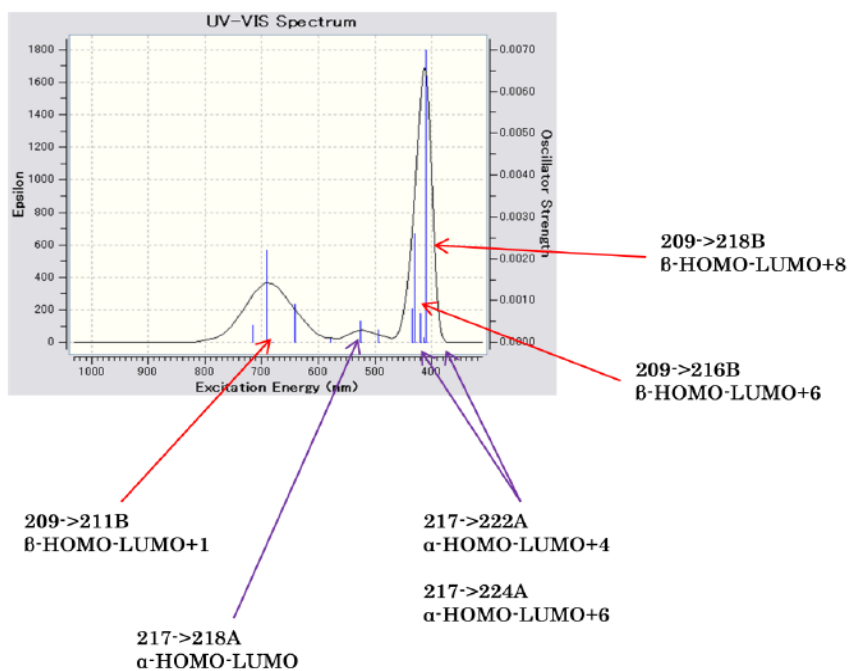

Figure S11. Predicted UV-Vis spectrum (from first 30 transition) of  $Fe(II)(py)_2MeOH](CNH)_2]_2[Au-(CN)_2]_3$

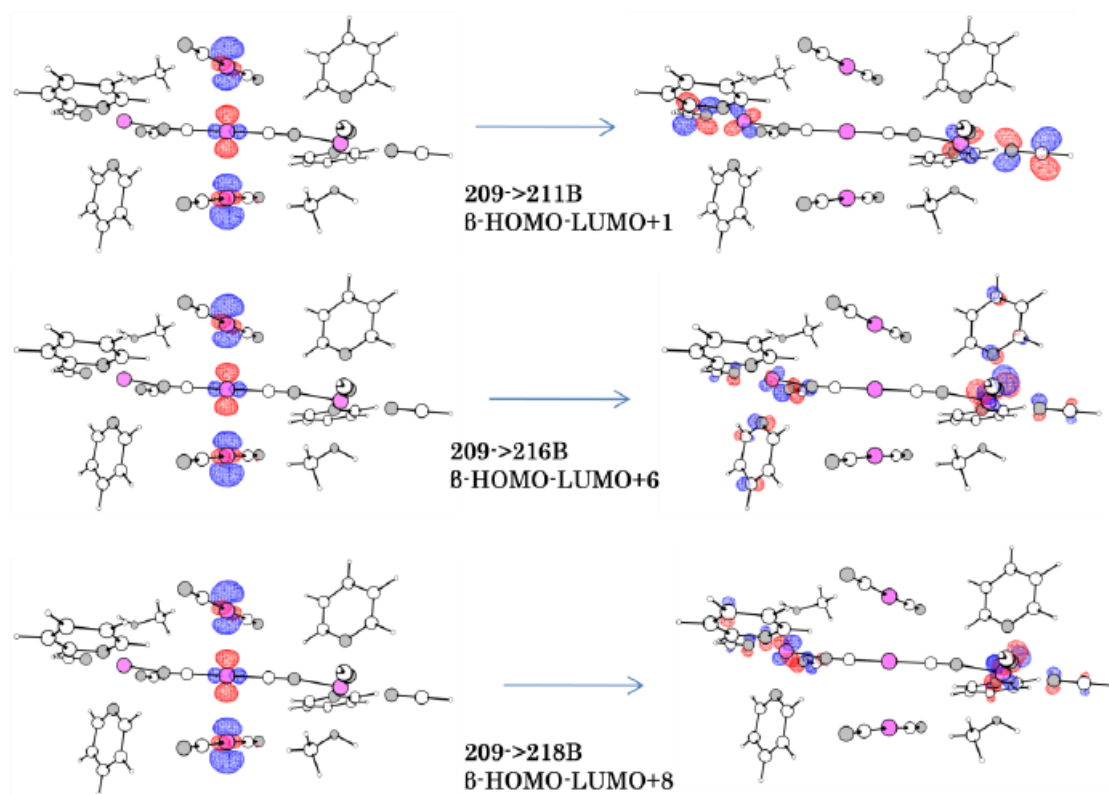

Figure S12. The UV-Vis active transition between spin-down orbitals ( $\beta$ ) from HOMO ( $d_{Au}\sigma^*\sigma^*$ ) to ( $d_{Fe-L}\pi^*$ ) orbitals

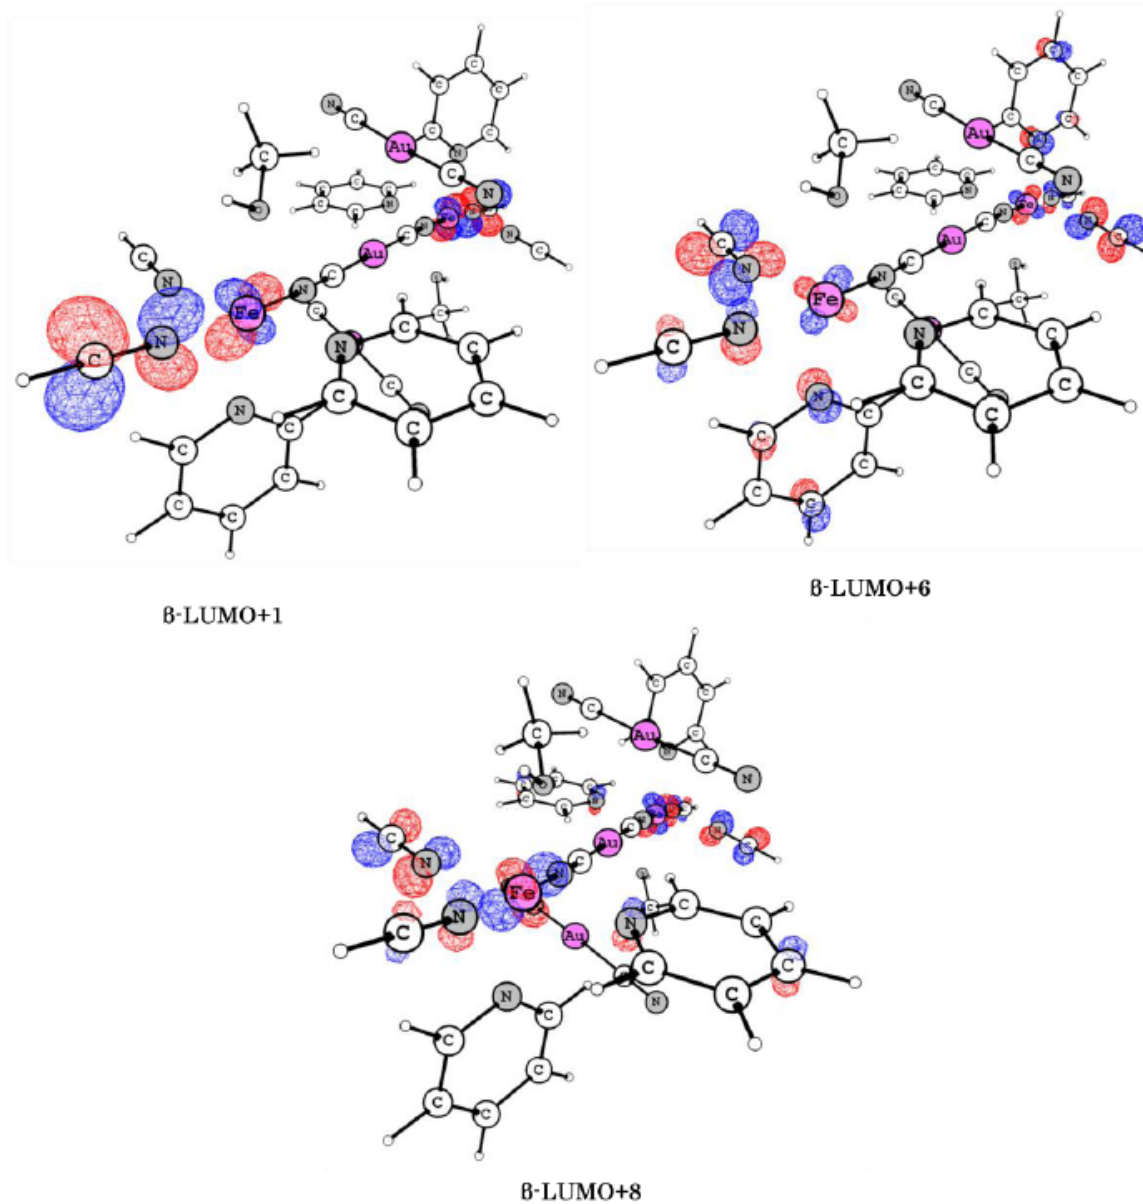

Figure S13. The UV-Vis active transition between spin-down orbitals ( $\beta$ ): ( $d_{Fe-L}\pi^*$ ) orbitals (zoomed up)

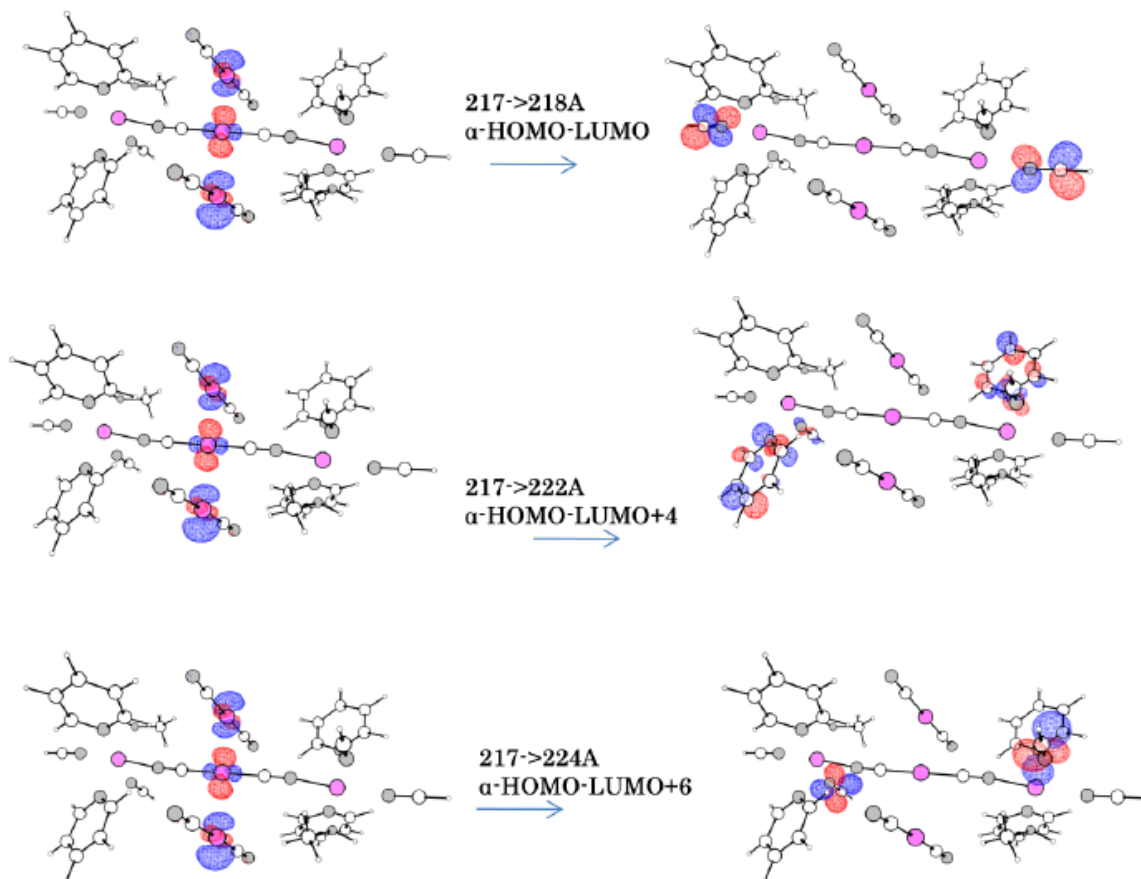

Figure S14. The UV-Vis active transition between spin-up orbitals ( $\alpha$ ) from  $\alpha$ -HOMO ( $d_{Au}\sigma^*\sigma^*$ ) to ( $p_L\pi^*$ ) orbitals

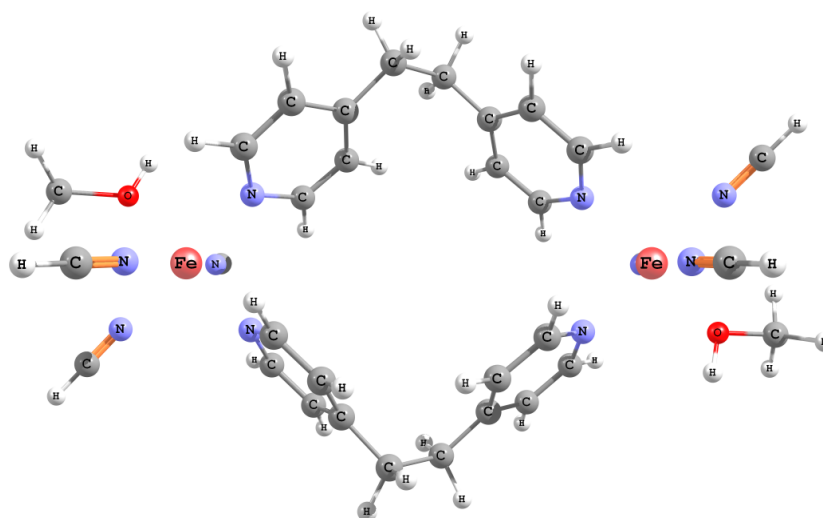

Figure S15. The structure of an empty  $Fe_2(bipe)_2$ -type macrocycle  $[Au(CN)_2]_3^{3+}$

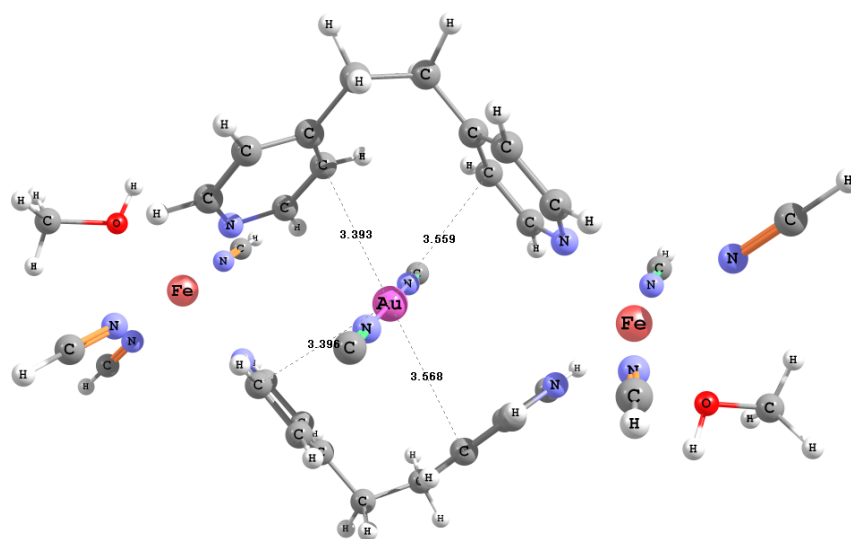

Figure S16. The structure of an  $Fe_2(bipe)_2$ -type macrocycle with  $[Au(CN)_2]_3^{3+}$  axle with short contacts

$\alpha$ HOMO

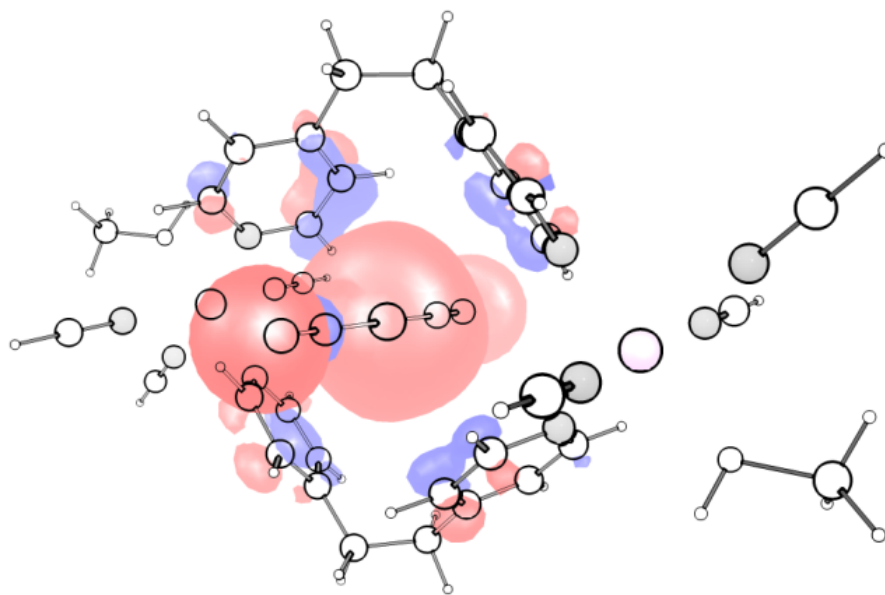

$\alpha$ HOMO-7

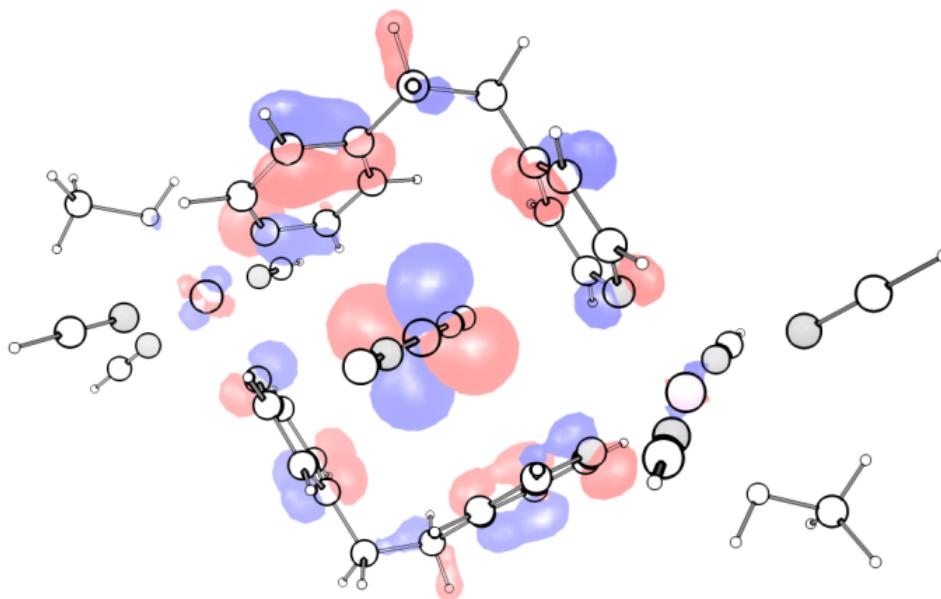

Figure S17. Examples for orbital interaction between the macrocycle and the axle in the  $Fe_2(bipe)_2$ -type macrocycle with  $[Au(CN)_2]_3^{3+}$  axle:  $\alpha$ HOMO (up) and  $\alpha$ HOMO-7 (down)
